# Supplementary material for: Low-Pressure Hydrothermal Processing of Disposable Face Masks into Oils
Source: MDPI journal article supplement (doi:10.3390/pr11102819), 2023-09-23
Supplement: s1 [file s1]

# Low-Pressure Hydrothermal Processing of Disposable Face Masks into Oils

Cagri Un<sup>1</sup> , Clayton Gentilcore<sup>1</sup> , Kathryn Ault<sup>1</sup> , Hung Gieng<sup>2</sup> , Petr Vozka<sup>2</sup> , Nien-Hwa Linda Wang<sup>1\*</sup> 

<sup>1</sup>Davidson School of Chemical Engineering, Purdue University, West Lafayette, IN 47907, USA

<sup>2</sup>College of Natural and Social Sciences, Department of Chemistry and Biochemistry, California State University, Los Angeles, CA 90032, USA

\*Correspondence: [nwang@purdue.edu](mailto:nwang@purdue.edu) (N-H.L.W.)

GC-FID analysis of the oil fractions recovered following batch distillation was conducted using a Shimadzu GC-2010 gas chromatography system paired with an autosampler and flame ionization detector (FID). The detailed method utilized for this analysis is shown in Supplementary-Table S1.

**Supplementary Table S1.** GC-FID Method for Hydrocarbon Product Analysis

|                            |                                                                                                         |
|----------------------------|---------------------------------------------------------------------------------------------------------|
| Column                     | 30m×0.32mm×0.25µm HP-5 Column<br>(FID: Front Detector, 20 Hz Data Rate,<br>0.01 min Minimum Peak Width) |
| Gases                      | 30 mL/min Make up flow,<br>40.0 mL/min H <sub>2</sub> , and 400 mL/min Air Flow                         |
| Temperature Program        | Chromatogram (Ch1)<br>Interval (msec) 40<br>Start Time(min) 0.000<br>End Time(min) 10.250               |
| Equipment Temperatures     | Injector: 350°C; Detector: 350°C                                                                        |
| Operation Pressures        | Injector: Starting at 11.5 psi, Constant Flow                                                           |
| Total Flow and Split Ratio | 40 cm/s flow Helium<br>Split Ratio of 120:1                                                             |
| Sample Injections          | 1 µL of sample injected (every experiment)                                                              |

The hydrocarbon content was quantified using the data obtained from GC×GC-FID analysis. The detailed contents of these analytical method and results are shown in the Supplementary-Table S2 and S3.

**Supplementary-Table S2. GC×GC-FID Method for Hydrocarbon Product Analysis**

| Instrument   | GC×GC-FID                              |
|--------------|----------------------------------------|
| Columns      | Rxi-17SilMS (30 m × 0.25mm × 0.25 μm)  |
|              | DB-1 HT (1 m × 0.25 mm × 0.10 μm)      |
|              | Deactivated (0.38 m × 0.25 mm)         |
| Injection    | Split/Splitless, 0.1 μl, 200:1, 285 °C |
| Carrier gas  | UHP He, 1.5 mL/min                     |
| Oven program | 40 °C (hold 1.5 min)                   |
|              | 40-320 °C, ramp rate 4 °C/min          |
|              | 320 °C (hold 1 min)                    |
| Offsets      | Secondary oven: 35 °C                  |
|              | Modulator: 20 °C                       |
| Modulation   | 1.7 s, hot pulse 0.28 s                |
| FID          | 300 °C, 200 HZ                         |

The compositions of NW-3, NB-2, FM-2, and FM-1 were analyzed using GCxGC-FID. The results are shown in Supplementary-Table S.3. The compositions of KJ-1 and KJ-2 are referenced in a literature [1].

**Supplementary-Table S3.** Compositions of Analyzed Oils from GCxGC-FID Analysis.

|                                  | NW-3         | NB-2         | FM-2         | FM-1         |
|----------------------------------|--------------|--------------|--------------|--------------|
|                                  |              |              |              |              |
| <b>Non-Hydrocarbon Compounds</b> | 0.141        | 0.191        | 1.404        | 2.200        |
|                                  |              |              |              |              |
| <b>Paraffins</b>                 |              |              |              |              |
| <b>n-Paraffins</b>               | <b>wt. %</b> | <b>wt. %</b> | <b>wt. %</b> | <b>wt. %</b> |
| n-paraffin C5                    | 0.000        | 0.000        | 0.000        | 0.000        |
| n-paraffin C6                    | 0.000        | 0.000        | 0.000        | 0.000        |
| n-paraffin C7                    | 0.000        | 0.000        | 0.000        | 0.000        |
| n-paraffin C8                    | 0.000        | 0.000        | 0.000        | 0.000        |
| n-paraffin C9                    | 0.000        | 1.412        | 0.000        | 0.000        |
| n-paraffin C10                   | 0.172        | 1.411        | 0.000        | 0.000        |
| n-paraffin C11                   | 0.066        | 1.447        | 0.203        | 0.198        |
| n-paraffin C12                   | 0.021        | 1.345        | 0.080        | 0.165        |
| n-paraffin C13                   | 1.086        | 1.278        | 1.387        | 0.548        |
| n-paraffin C14                   | 0.035        | 1.158        | 0.111        | 0.098        |
| n-paraffin C15                   | 0.000        | 1.128        | 0.095        | 0.077        |
| n-paraffin C16                   | 0.016        | 1.072        | 0.098        | 0.072        |
| n-paraffin C17                   | 0.000        | 0.984        | 0.116        | 0.084        |
| n-paraffin C18                   | 0.000        | 0.960        | 0.022        | 0.020        |
| n-paraffin C19                   | 0.009        | 0.867        | 0.094        | 0.066        |
| n-paraffin C20                   | 0.000        | 0.873        | 0.090        | 0.046        |
| n-paraffin C21                   | 0.000        | 0.751        | 0.071        | 0.044        |
| n-paraffin C22                   | 0.000        | 0.714        | 0.101        | 0.044        |
| n-paraffin C23                   | 0.000        | 0.652        | 0.058        | 0.035        |
| n-paraffin C24                   | 0.000        | 0.620        | 0.063        | 0.035        |

|                          |              |               |              |              |
|--------------------------|--------------|---------------|--------------|--------------|
| n-paraffin C25           | 0.000        | 0.543         | 0.061        | 0.035        |
| n-paraffin C26           | 0.000        | 0.512         | 0.067        | 0.035        |
| n-paraffin C27           | 0.000        | 0.426         | 0.058        | 0.006        |
| n-paraffin C28           | 0.000        | 0.413         | 0.066        | 0.004        |
| n-paraffin C29           | 0.000        | 0.359         | 0.059        | 0.018        |
| n-paraffin C30           | 0.000        | 0.306         | 0.047        | 0.022        |
| n-paraffin C31           | 0.000        | 0.247         | 0.056        | 0.021        |
| n-paraffin C32           | 0.000        | 0.207         | 0.043        | 0.019        |
| n-paraffin C33           | 0.000        | 0.187         | 0.044        | 0.017        |
| n-paraffin C34           | 0.000        | 0.000         | 0.062        | 0.012        |
| n-paraffin C35           | 0.000        | 0.000         | 0.000        | 0.000        |
| n-paraffin C36           | 0.000        | 0.000         | 0.000        | 0.000        |
| n-paraffin C37           | 0.000        | 0.000         | 0.000        | 0.000        |
| <b>total n-paraffins</b> | <b>1.405</b> | <b>19.873</b> | <b>3.153</b> | <b>1.721</b> |
|                          |              |               |              |              |
| <b>Isoparaffins</b>      | <b>wt. %</b> | <b>wt. %</b>  | <b>wt. %</b> | <b>wt. %</b> |
| i-paraffin C5            | 0.000        | 0.000         | 0.000        | 0.000        |
| i-paraffin C6            | 0.000        | 0.000         | 0.000        | 0.000        |
| i-paraffin C7            | 0.000        | 0.000         | 0.000        | 0.000        |
| i-paraffin C8            | 3.289        | 1.635         | 0.000        | 0.000        |
| i-paraffin C9            | 0.000        | 0.033         | 0.000        | 0.000        |
| i-paraffin C10           | 0.104        | 0.129         | 0.378        | 0.461        |
| i-paraffin C11           | 0.537        | 0.171         | 1.567        | 2.803        |
| i-paraffin C12           | 0.310        | 0.112         | 0.156        | 0.171        |
| i-paraffin C13           | 0.928        | 0.161         | 2.096        | 1.372        |
| i-paraffin C14           | 0.496        | 0.196         | 0.545        | 0.564        |
| i-paraffin C15           | 0.714        | 0.133         | 0.702        | 0.414        |
| i-paraffin C16           | 1.742        | 0.172         | 2.980        | 1.454        |
| i-paraffin C17           | 1.265        | 0.150         | 1.298        | 0.870        |
| i-paraffin C18           | 0.717        | 0.070         | 0.812        | 0.278        |
| i-paraffin C19           | 2.140        | 0.099         | 3.711        | 1.469        |
| i-paraffin C20           | 0.959        | 0.086         | 1.210        | 0.578        |
| i-paraffin C21           | 1.384        | 0.078         | 2.526        | 0.854        |
| i-paraffin C22           | 0.802        | 0.062         | 1.099        | 0.439        |
| i-paraffin C23           | 0.507        | 0.028         | 0.913        | 0.395        |
| i-paraffin C24           | 1.272        | 0.030         | 2.337        | 0.744        |
| i-paraffin C25           | 0.394        | 0.011         | 0.421        | 0.280        |
| i-paraffin C26           | 0.793        | 0.036         | 1.929        | 0.589        |

|                            |               |              |               |               |
|----------------------------|---------------|--------------|---------------|---------------|
| i-paraffin C27             | 0.253         | 0.059        | 0.300         | 0.097         |
| i-paraffin C28             | 0.401         | 0.000        | 0.624         | 0.161         |
| i-paraffin C29             | 0.549         | 0.032        | 1.377         | 0.411         |
| i-paraffin C30             | 0.053         | 0.065        | 0.013         | 0.039         |
| i-paraffin C31             | 0.104         | 0.001        | 0.383         | 0.118         |
| i-paraffin C32             | 0.585         | 0.092        | 1.165         | 0.371         |
| i-paraffin C33             | 0.161         | 0.011        | 0.291         | 0.083         |
| i-paraffin C34             | 0.625         | 0.221        | 1.227         | 0.403         |
| i-paraffin C35             | 0.126         | 0.128        | 0.486         | 0.126         |
| i-paraffin C36+            | 0.845         | 0.219        | 1.802         | 0.414         |
| <b>total iso-paraffins</b> | <b>22.054</b> | <b>4.219</b> | <b>32.348</b> | <b>15.959</b> |
|                            |               |              |               |               |
| <b>Cycloparaffins</b>      |               |              |               |               |
| <b>Monocycloparaffins</b>  | <b>wt. %</b>  | <b>wt. %</b> | <b>wt. %</b>  | <b>wt. %</b>  |
| monocyclo-paraffin C5      | 7.997         | 3.529        | 6.171         | 6.821         |
| monocyclo-paraffin C6      | 6.610         | 7.147        | 4.557         | 7.290         |
| monocyclo-paraffin C7      | 2.645         | 3.470        | 3.576         | 5.668         |
| monocyclo-paraffin C8      | 22.494        | 1.593        | 19.886        | 17.861        |
| monocyclo-paraffin C9      | 3.617         | 2.873        | 2.606         | 3.949         |
| monocyclo-paraffin C10     | 3.709         | 2.873        | 1.042         | 1.718         |
| monocyclo-paraffin C11     | 6.047         | 2.627        | 5.635         | 4.147         |
| monocyclo-paraffin C12     | 2.033         | 1.030        | 1.800         | 1.841         |
| monocyclo-paraffin C13     | 1.130         | 0.705        | 0.854         | 0.731         |
| monocyclo-paraffin C14     | 3.871         | 0.825        | 4.318         | 2.483         |
| monocyclo-paraffin C15     | 0.180         | 0.409        | 0.182         | 0.151         |
| monocyclo-paraffin C16     | 0.278         | 0.719        | 0.286         | 0.291         |
| monocyclo-paraffin C17     | 0.839         | 0.687        | 0.707         | 0.246         |
| monocyclo-paraffin C18     | 0.065         | 0.694        | 0.101         | 0.052         |
| monocyclo-paraffin C19     | 0.017         | 0.278        | 0.085         | 0.136         |
| monocyclo-paraffin C20     | 0.012         | 0.413        | 0.124         | 0.095         |
| monocyclo-paraffin C21     | 0.000         | 0.794        | 0.164         | 0.114         |
| monocyclo-paraffin C22     | 0.000         | 0.825        | 0.198         | 0.101         |
| monocyclo-paraffin C23     | 0.000         | 0.647        | 0.158         | 0.071         |
| monocyclo-paraffin C24     | 0.000         | 0.563        | 0.189         | 0.069         |
| monocyclo-paraffin C25     | 0.000         | 1.376        | 0.408         | 0.119         |
| monocyclo-paraffin C26     | 0.000         | 0.749        | 0.184         | 0.009         |
| monocyclo-paraffin C27     | 0.000         | 1.274        | 0.321         | 0.079         |
| monocyclo-paraffin C28     | 0.000         | 1.139        | 0.396         | 0.080         |

|                           |              |              |              |              |
|---------------------------|--------------|--------------|--------------|--------------|
| monocyclo-paraffin C29+   | 0.000        | 0.820        | 0.420        | 0.170        |
| monocyclo-paraffin C30+   | 0.000        | 0.000        | 0.000        | 0.000        |
| total monocyclo-paraffins | 61.544       | 38.058       | 54.368       | 54.290       |
|                           |              |              |              |              |
| <b>Dicycloparaffins</b>   | <b>wt. %</b> | <b>wt. %</b> | <b>wt. %</b> | <b>wt. %</b> |
| dicyclo-paraffin C8       | 0.271        | 1.664        | 0.272        | 0.701        |
| dicyclo-paraffin C9       | 0.303        | 0.748        | 0.153        | 0.532        |
| dicyclo-paraffin C10      | 1.506        | 1.774        | 1.026        | 2.006        |
| dicyclo-paraffin C11      | 0.549        | 1.551        | 0.130        | 0.651        |
| dicyclo-paraffin C12      | 2.486        | 2.907        | 1.725        | 2.938        |
| dicyclo-paraffin C13      | 0.757        | 2.854        | 0.236        | 0.743        |
| dicyclo-paraffin C14      | 0.336        | 2.366        | 0.189        | 0.547        |
| dicyclo-paraffin C15      | 0.687        | 2.582        | 0.373        | 0.700        |
| dicyclo-paraffin C16      | 0.078        | 2.213        | 0.161        | 0.311        |
| dicyclo-paraffin C17      | 0.052        | 1.959        | 0.140        | 0.267        |
| dicyclo-paraffin C18      | 0.029        | 1.581        | 0.219        | 0.166        |
| dicyclo-paraffin C19      | 0.002        | 1.706        | 0.215        | 0.216        |
| dicyclo-paraffin C20      | 0.000        | 1.488        | 0.211        | 0.181        |
| dicyclo-paraffin C21      | 0.000        | 1.706        | 0.138        | 0.155        |
| dicyclo-paraffin C22      | 0.000        | 0.704        | 0.164        | 0.110        |
| dicyclo-paraffin C23      | 0.000        | 0.715        | 0.147        | 0.071        |
| dicyclo-paraffin C24      | 0.000        | 0.977        | 0.111        | 0.081        |
| dicyclo-paraffin C25      | 0.000        | 0.962        | 0.114        | 0.024        |
| dicyclo-paraffin C26      | 0.000        | 0.918        | 0.170        | 0.010        |
| dicyclo-paraffin C27+     | 0.255        | 0.198        | 0.046        | 0.021        |
| total dicyclo-paraffins   | 7.311        | 31.575       | 5.941        | 10.431       |
|                           |              |              |              |              |
| <b>Tricycloparaffins</b>  | <b>wt. %</b> | <b>wt. %</b> | <b>wt. %</b> | <b>wt. %</b> |
| tricyclo-paraffin C10     | 0.002        | 0.029        | 0.001        | 0.005        |
| tricyclo-paraffin C11     | 0.001        | 0.054        | 0.001        | 0.014        |
| tricyclo-paraffin C12     | 0.019        | 0.059        | 0.005        | 0.019        |
| tricyclo-paraffin C13     | 0.005        | 0.113        | 0.004        | 0.009        |
| tricyclo-paraffin C14     | 0.031        | 0.053        | 0.000        | 0.026        |
| tricyclo-paraffin C15     | 0.048        | 0.027        | 0.001        | 0.038        |
| tricyclo-paraffin C16     | 0.075        | 0.047        | 0.001        | 0.028        |
| tricyclo-paraffin C17     | 0.045        | 0.002        | 0.000        | 0.001        |
| tricyclo-paraffin C18     | 0.003        | 0.027        | 0.005        | 0.005        |
| tricyclo-paraffin C19     | 0.001        | 0.120        | 0.004        | 0.000        |

|                                 |               |               |               |               |
|---------------------------------|---------------|---------------|---------------|---------------|
| tricyclo-paraffin C20           | 0.000         | 0.208         | 0.018         | 0.009         |
| tricyclo-paraffin C21           | 0.000         | 0.197         | 0.024         | 0.013         |
| tricyclo-paraffin C22           | 0.000         | 0.141         | 0.014         | 0.024         |
| tricyclo-paraffin C23           | 0.000         | 0.076         | 0.022         | 0.013         |
| tricyclo-paraffin C24           | 0.000         | 0.056         | 0.001         | 0.000         |
| tricyclo-paraffin C25           | 0.000         | 0.004         | 0.000         | 0.000         |
| tricyclo-paraffin C26           | 0.000         | 0.012         | 0.001         | 0.000         |
| tricyclo-paraffin C27+          | 0.000         | 0.001         | 0.003         | 0.026         |
| <b>total tricyclo-paraffins</b> | <b>0.229</b>  | <b>1.225</b>  | <b>0.103</b>  | <b>0.230</b>  |
| <b>total cycloparaffins</b>     | <b>69.085</b> | <b>70.858</b> | <b>60.412</b> | <b>64.950</b> |
|                                 |               |               |               |               |
| <b>Aromatics</b>                |               |               |               |               |
| <b>Alkylbenzenes</b>            | <b>wt. %</b>  | <b>wt. %</b>  | <b>wt. %</b>  | <b>wt. %</b>  |
| benzene C6                      | 0.045         | 0.112         | 0.249         | 0.568         |
| toluene C7                      | 0.333         | 0.402         | 0.207         | 0.835         |
| C2-benzene C8                   | 1.048         | 0.415         | 0.484         | 1.932         |
| C3-benzene C9                   | 0.988         | 0.312         | 0.392         | 1.774         |
| C4-benzene C10                  | 0.383         | 0.223         | 0.121         | 0.701         |
| C5-benzene C11                  | 0.218         | 0.204         | 0.095         | 0.385         |
| C6-benzene C12                  | 0.257         | 0.129         | 0.081         | 0.406         |
| C7-benzene C13                  | 0.159         | 0.102         | 0.045         | 0.220         |
| C8-benzene C14                  | 0.071         | 0.070         | 0.016         | 0.093         |
| C9-benzene C15                  | 0.040         | 0.081         | 0.016         | 0.055         |
| C10-benzene C16                 | 0.024         | 0.062         | 0.000         | 0.029         |
| C11-benzene C17                 | 0.042         | 0.061         | 0.000         | 0.003         |
| C12-benzene C18                 | 0.005         | 0.062         | 0.000         | 0.003         |
| C13-benzene C19                 | 0.000         | 0.030         | 0.000         | 0.006         |
| C14-benzene C20                 | 0.000         | 0.036         | 0.000         | 0.010         |
| C15-benzene C21                 | 0.000         | 0.033         | 0.000         | 0.001         |
| C16-benzene C22                 | 0.000         | 0.028         | 0.000         | 0.118         |
| C16-benzene C23                 | 0.000         | 0.014         | 0.000         | 0.007         |
| C16-benzene C24                 | 0.000         | 0.020         | 0.000         | 0.000         |
| C16-benzene C25                 | 0.000         | 0.009         | 0.000         | 0.000         |
| C16-benzene C26+                | 0.000         | 0.000         | 0.000         | 0.000         |
| <b>total alkylbenzenes</b>      | <b>3.613</b>  | <b>2.404</b>  | <b>1.705</b>  | <b>7.145</b>  |
|                                 |               |               |               |               |
| <b>Cycloaromatics</b>           | <b>wt. %</b>  | <b>wt. %</b>  | <b>wt. %</b>  | <b>wt. %</b>  |
| cycloaromatic C9                | 0.003         | 0.055         | 0.004         | 0.014         |



|                             |              |              |              |              |
|-----------------------------|--------------|--------------|--------------|--------------|
| cycloaromatic C10           | 0.073        | 0.212        | 0.014        | 0.159        |
| cycloaromatic C11           | 0.288        | 0.218        | 0.094        | 0.575        |
| cycloaromatic C12           | 0.465        | 0.286        | 0.122        | 0.854        |
| cycloaromatic C13           | 0.514        | 0.229        | 0.072        | 0.894        |
| cycloaromatic C14           | 0.342        | 0.145        | 0.024        | 0.528        |
| cycloaromatic C15           | 0.255        | 0.061        | 0.003        | 0.221        |
| cycloaromatic C16           | 0.053        | 0.008        | 0.000        | 0.023        |
| cycloaromatic C17           | 0.016        | 0.022        | 0.000        | 0.010        |
| cycloaromatic C18           | 0.000        | 0.033        | 0.000        | 0.003        |
| cycloaromatic C19           | 0.001        | 0.016        | 0.000        | 0.003        |
| cycloaromatic C20           | 0.000        | 0.021        | 0.000        | 0.040        |
| cycloaromatic C21           | 0.000        | 0.011        | 0.000        | 0.069        |
| cycloaromatic C22           | 0.000        | 0.014        | 0.000        | 0.005        |
| cycloaromatic C23           | 0.000        | 0.014        | 0.000        | 0.000        |
| cycloaromatic C24           | 0.000        | 0.008        | 0.000        | 0.000        |
| cycloaromatic C25           | 0.000        | 0.004        | 0.000        | 0.001        |
| cycloaromatic C26+          | 0.000        | 0.000        | 0.000        | 0.000        |
| <b>total cycloaromatics</b> | <b>2.011</b> | <b>1.357</b> | <b>0.332</b> | <b>3.397</b> |
|                             |              |              |              |              |
| <b>Alkyl naphthalenes</b>   | <b>wt. %</b> | <b>wt. %</b> | <b>wt. %</b> | <b>wt. %</b> |
| naphthalene C10             | 0.006        | 0.028        | 0.012        | 0.027        |
| alkyl naphthalenes C11      | 0.030        | 0.075        | 0.045        | 0.113        |
| alkyl naphthalenes C12      | 0.083        | 0.075        | 0.011        | 0.181        |
| alkyl naphthalenes C13      | 0.088        | 0.095        | 0.020        | 0.163        |
| alkyl naphthalenes C14      | 0.101        | 0.093        | 0.000        | 0.149        |
| alkyl naphthalenes C15      | 0.217        | 0.106        | 0.000        | 0.374        |
| alkyl naphthalenes C16      | 0.250        | 0.045        | 0.000        | 0.232        |
| alkyl naphthalenes C17      | 0.220        | 0.011        | 0.000        | 0.052        |
| alkyl naphthalenes C18      | 0.041        | 0.022        | 0.000        | 0.061        |
| alkyl naphthalenes C19      | 0.008        | 0.010        | 0.000        | 0.000        |
| alkyl naphthalenes C20      | 0.005        | 0.003        | 0.000        | 0.008        |
| alkyl naphthalenes C21      | 0.000        | 0.000        | 0.000        | 0.001        |
| alkyl naphthalenes C22      | 0.000        | 0.000        | 0.000        | 0.000        |
| alkyl naphthalenes C23      | 0.000        | 0.014        | 0.000        | 0.000        |
| alkyl naphthalenes C24      | 0.000        | 0.000        | 0.000        | 0.000        |
| alkyl naphthalenes C25+     | 0.000        | 0.000        | 0.000        | 0.001        |
| <b>total naphthalenes</b>   | <b>1.048</b> | <b>0.578</b> | <b>0.088</b> | <b>1.361</b> |
|                             |              |              |              |              |

| <b>Biphenyls</b>                         | <b>wt. %</b> | <b>wt. %</b> | <b>wt. %</b> | <b>wt. %</b> |
|------------------------------------------|--------------|--------------|--------------|--------------|
| triaromatics C12                         | 0.002        | 0.000        | 0.082        | 0.168        |
| triaromatics C13                         | 0.006        | 0.013        | 0.034        | 0.113        |
| triaromatics C14                         | 0.013        | 0.057        | 0.031        | 0.168        |
| triaromatics C15                         | 0.051        | 0.072        | 0.024        | 0.185        |
| triaromatics C16                         | 0.059        | 0.091        | 0.000        | 0.321        |
| triaromatics C17                         | 0.082        | 0.068        | 0.000        | 0.324        |
| triaromatics C18                         | 0.124        | 0.033        | 0.000        | 0.380        |
| triaromatics C19                         | 0.083        | 0.029        | 0.000        | 0.100        |
| triaromatics C20                         | 0.045        | 0.003        | 0.000        | 0.302        |
| triaromatics C21                         | 0.000        | 0.003        | 0.000        | 0.164        |
| triaromatics C22                         | 0.000        | 0.000        | 0.000        | 0.113        |
| triaromatics C23                         | 0.058        | 0.008        | 0.000        | 0.099        |
| triaromatics C24                         | 0.016        | 0.000        | 0.000        | 0.012        |
| triaromatics C25                         | 0.000        | 0.000        | 0.000        | 0.002        |
| triaromatics C26+                        | 0.000        | 0.000        | 0.000        | 0.000        |
| <b>total biphenyls</b>                   | <b>0.539</b> | <b>0.376</b> | <b>0.171</b> | <b>2.452</b> |
|                                          |              |              |              |              |
| <b>Phenanthrenes + Anthracenes</b>       | <b>wt. %</b> | <b>wt. %</b> | <b>wt. %</b> | <b>wt. %</b> |
| Ph C14                                   | 0.000        | 0.000        | 0.015        | 0.035        |
| Ph C15                                   | 0.000        | 0.000        | 0.015        | 0.012        |
| Ph C16                                   | 0.000        | 0.011        | 0.000        | 0.001        |
| Ph C17                                   | 0.000        | 0.019        | 0.000        | 0.049        |
| Ph C18                                   | 0.000        | 0.000        | 0.000        | 0.088        |
| Ph C19                                   | 0.013        | 0.009        | 0.000        | 0.042        |
| Ph C20                                   | 0.027        | 0.029        | 0.003        | 0.138        |
| Ph C21                                   | 0.034        | 0.000        | 0.000        | 0.060        |
| Ph C22                                   | 0.000        | 0.000        | 0.000        | 0.000        |
| Ph C23+                                  | 0.000        | 0.000        | 0.000        | 0.046        |
| <b>total phenanthrenes + anthracenes</b> | <b>0.075</b> | <b>0.068</b> | <b>0.033</b> | <b>0.470</b> |
|                                          |              |              |              |              |
| <b>Pyrenes</b>                           | <b>wt. %</b> | <b>wt. %</b> | <b>wt. %</b> | <b>wt. %</b> |
| Py C16                                   | 0.006        | 0.000        | 0.059        | 0.071        |
| Py C17                                   | 0.005        | 0.012        | 0.103        | 0.208        |
| Py C18                                   | 0.000        | 0.012        | 0.000        | 0.009        |
| Py C19                                   | 0.000        | 0.000        | 0.030        | 0.031        |
| Py C20                                   | 0.000        | 0.044        | 0.027        | 0.020        |
| Py C21                                   | 0.005        | 0.008        | 0.001        | 0.001        |

|                        |                |                |                |                |
|------------------------|----------------|----------------|----------------|----------------|
| Py C22                 | 0.014          | 0.000          | 0.034          | 0.003          |
| Py C23                 | 0.000          | 0.000          | 0.100          | 0.000          |
| Py C24+                | 0.000          | 0.000          | 0.000          | 0.000          |
| <b>total pyrenes</b>   | <b>0.030</b>   | <b>0.075</b>   | <b>0.354</b>   | <b>0.345</b>   |
| <b>total aromatics</b> | <b>7.315</b>   | <b>4.859</b>   | <b>2.683</b>   | <b>15.169</b>  |
|                        |                |                |                |                |
| <b>TOTAL</b>           | <b>100.000</b> | <b>100.000</b> | <b>100.000</b> | <b>100.000</b> |

**Supplementary-Table S4.** Experimental Conditions and Product Yields from Individual FM-1 Runs

| Exp.<br>No. | Set Temp., $T_s$ (°C)<br>and<br>Set Time, $t_s$ (min.) | Effective Average<br>Temp., $T_{EAV}$<br>(°C) | Effective Reaction<br>Time, $t_{ER}$<br>(min.) | Oil<br>Yield<br>% | Gas<br>Yield<br>% | Wax<br>Yield<br>% | Char<br>Yield<br>% |
|-------------|--------------------------------------------------------|-----------------------------------------------|------------------------------------------------|-------------------|-------------------|-------------------|--------------------|
| FM-1a       | 450-10                                                 | 396                                           | 32                                             | 81.5              | 17.6              | 0                 | 0.8                |
| FM-1b       | 450-10                                                 | 403                                           | 30                                             | 81.9              | 17.4              | 0                 | 0.7                |
| FM-1c       | 450-10                                                 | 405                                           | 28                                             | 81.7              | 17.2              | 0                 | 1.1                |

Supplementary-Table S5 shows a comprehensive overview of the compositions of various distilled oils with different fractions. These fractions include Naphtha, Middle Distillate, and Heavy Oil. The data in this table pertains to a range of oil samples, including NW-1, NW-2, NW-3, NW-4, NB-1, NB-2, EL-1, FM-1, and FM-2.

**Supplementary-Table S5.** Weight Fractions of Distilled Oils

| <b>Fraction</b>           | <b>NW-1</b> | <b>NW-2</b> | <b>NW-3</b> | <b>NW-4</b> | <b>NB-1</b> | <b>NB-2</b> | <b>EL-1</b> | <b>FM-1<br/>(3 trials)</b> | <b>FM-1a</b> | <b>FM-1b</b> | <b>FM-1c</b> | <b>FM-2</b> |
|---------------------------|-------------|-------------|-------------|-------------|-------------|-------------|-------------|----------------------------|--------------|--------------|--------------|-------------|
| Naphtha<br>%              | 70.5        | 69.4        | 61.8        | 63.0        | 50.7        | 45.6        | -           | 50.9±0.8                   | 50.4         | 52.0         | 50.2         | 27          |
| Middle<br>Distillate<br>% | 12.3        | 12.5        | 22.1        | 20.0        | 23.0        | 20.7        | -           | 20.3±0.4                   | 20.2         | 21.0         | 19.7         | 33          |
| Heavy Oil<br>%            | 17.2        | 18.1        | 16.1        | 17.0        | 26.3        | 33.7        | -           | 28.8±1.2                   | 29.2         | 27.0         | 30.1         | 40          |

Net energy and GHG emission calculations can be found in the Supplementary-Table S6.

**Supplementary Table S6.** Estimated energy inputs, outputs and GHG emissions for LP-HTP, incineration, and landfill

| Methods of Face Mask Disposal | Energy Inputs (MJ / kg face masks) | Energy Outputs (MJ / kg face masks) | Difference of Energy Outputs and Inputs (MJ / kg face masks) | GHG Emissions (kg CO <sub>2</sub> / kg face masks) |
|-------------------------------|------------------------------------|-------------------------------------|--------------------------------------------------------------|----------------------------------------------------|
| LP-HTP                        | 1.46 <sup>a</sup>                  | 43.19 <sup>b</sup>                  | 41.73                                                        | 0.10 <sup>c</sup>                                  |
| SWL                           | 7.04 <sup>a</sup>                  | 34.41 <sup>b</sup>                  | 27.37                                                        | 0.47 <sup>c</sup>                                  |
| Pyrolysis                     | 1.33 <sup>a</sup>                  | 39.51 <sup>b</sup>                  | 38.18                                                        | 0.09 <sup>c</sup>                                  |
| Incineration                  | 1.79 <sup>d</sup>                  | 14.06 <sup>e</sup>                  | 12.27                                                        | 1.83 <sup>f</sup>                                  |
| Landfilling                   | 0.38 <sup>g</sup>                  | ~0                                  | -0.38                                                        | 0.15 <sup>h</sup>                                  |

- a. For LP-HTP, SWL, and pyrolysis, 1.3 MJ/kg required for polyolefin conversion. 0.16 MJ/kg required for water heating in LP-HTP, and 5.74 MJ/kg required for water heating in SWL. Pyrolysis upgrading processes require 0.03 MJ/kg. [1]
- b. Based on yields of 82 wt.% oil and 17 wt.% gas (FM-1) from LP-HTP, assuming the oil has the energy content of crude oil (43.05 MJ/kg, <https://www.ncbi.nlm.nih.gov/pmc/articles/PMC4687841/>) and the gas has the energy content of propane (46.4 MJ/kg, [https://www.engineeringtoolbox.com/fuels-higher-calorific-values-d\\_169.html](https://www.engineeringtoolbox.com/fuels-higher-calorific-values-d_169.html)). This gas composition is assumed based on gases produced from PP and HDPE pellets in previous LP-HTP studies [1] and the composition of gas from ear-loops (EL) is not considered. Furthermore, energy outputs from pyrolysis and SWL are based on their respective oil and gas yields shown in previous literature, with 81 wt.% oil and 10 wt.% gas from pyrolysis [2], and 67 wt.% oil and 12 wt.% gas from SWL [3].
- c. Based on propane combustion for required energy input, with assumed 90% efficiency [1]
- d. Based on reported energy inputs from polyolefin waste incineration [4].
- e. Based on reported energy recovery from polyolefin waste incineration (Vlasopoulos 2023). Values from Vlasopoulos are based on case studies using “default” polyolefin waste streams [4].
- f. Based on reported greenhouse gas emissions from polyolefin waste waste incineration (Vlasopoulos 2023). Values from Vlasopoulos are based on case studies using “default” polyolefin waste streams and based on the global warming potentials (GWP) [4].
- g. Based on reported energy inputs for polyolefin waste landfilling (Vlasopoulos 2023). Values from Vlasopoulos are based on case studies using “default” polyolefin waste streams [4].
- h. Based on reported greenhouse gas emissions for polyolefin waste landfilling (Vlasopoulos 2023). Values from Vlasopoulos are based on case studies using “default” polyolefin waste streams and based on the global warming potentials (GWP) [4].

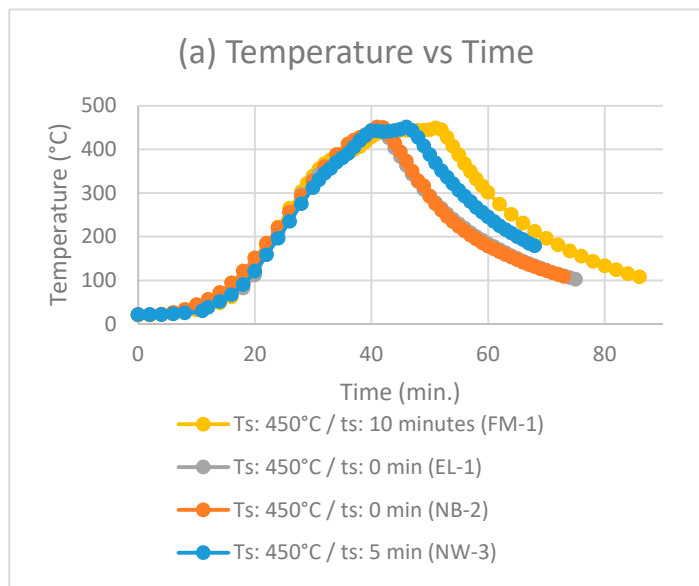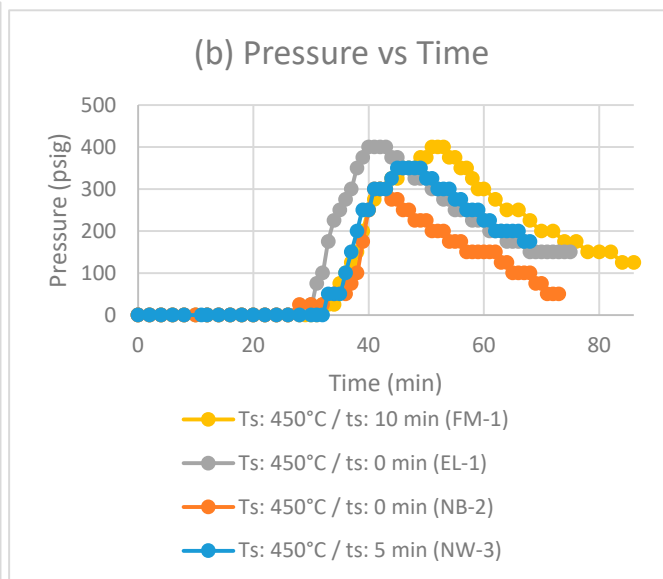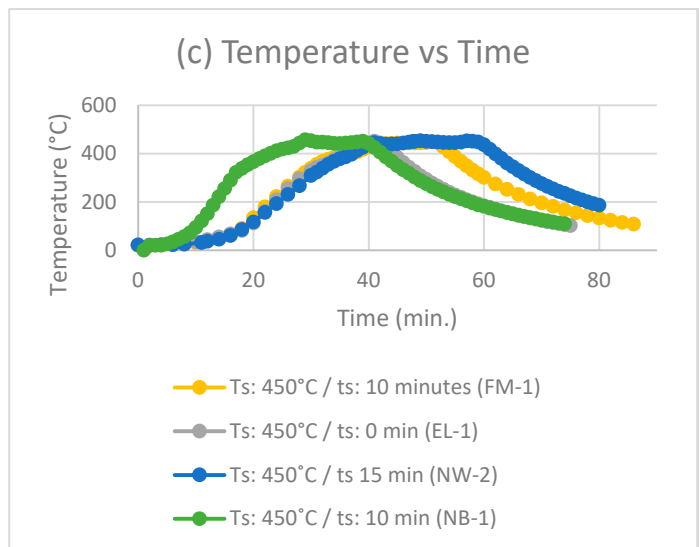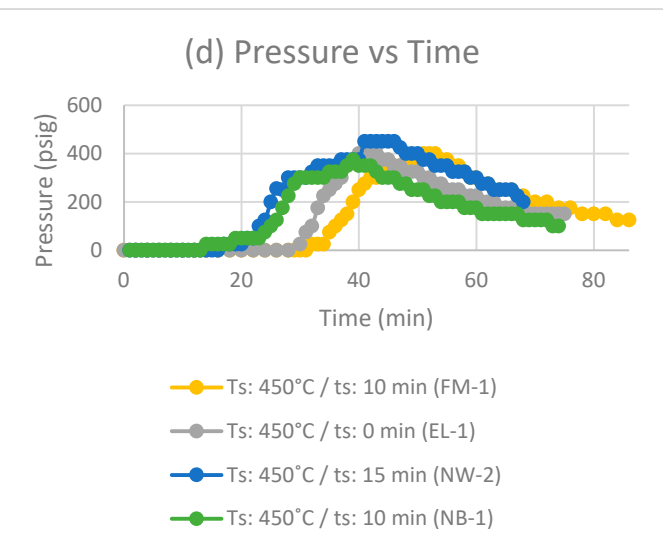

**Supplementary- Figure S1.** (a) Temperature vs time and (b) Pressure vs time profiles for FM-1, EL-1, NB-2, NW-3 experiments. (c) Temperature vs time and (d) Pressure vs time profiles for FM-1, EL-1, NW-2, NB-1 experiments.

When assuming independent conversion reactions for HDPE, PP, and Polyester+Spandex within the FM process, as calculated in Supplementary-Figure S2, the FM-Theoretical model had initially predicted a 7% char yield. However, the actual char yield obtained in FM-1 production was significantly lower, at only 1%."

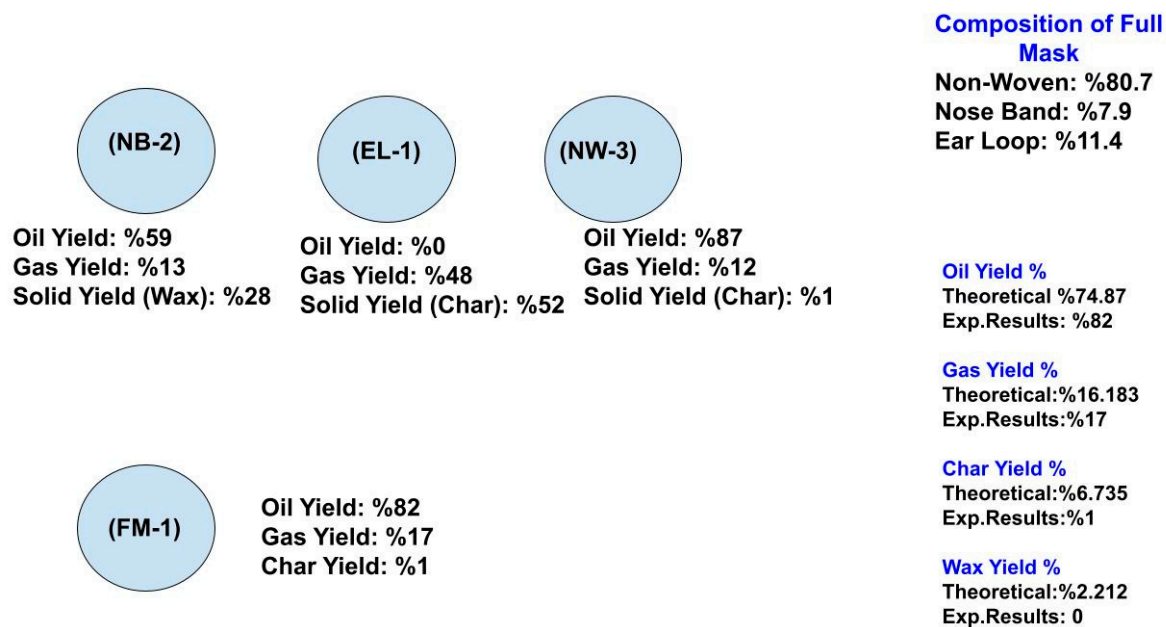

**Supplementary-Figure S2.** The theoretical calculations of NB-2, EL-1, NW-3 and FM-1



The GC-FID results of naphtha and middle distillate, obtained from the distillation of NW experiments, were shown in Supplementary-Figures S3–S7. Comparative analysis was conducted using commercially available gasoline, diesel and oil mix (C8-9=10=12-14-16).

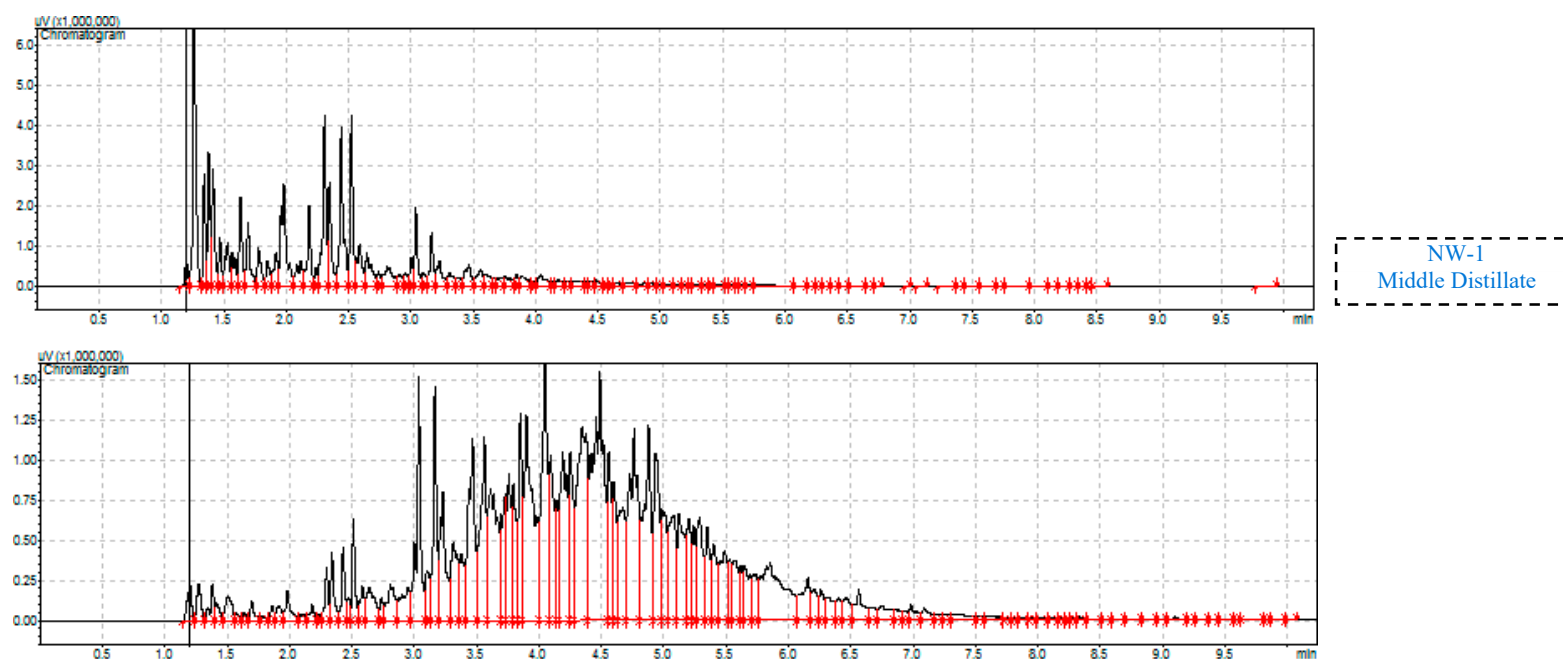

**Supplementary-Figure S3.** GC-FID results of NW-1 naphtha and NW-1 middle distillate

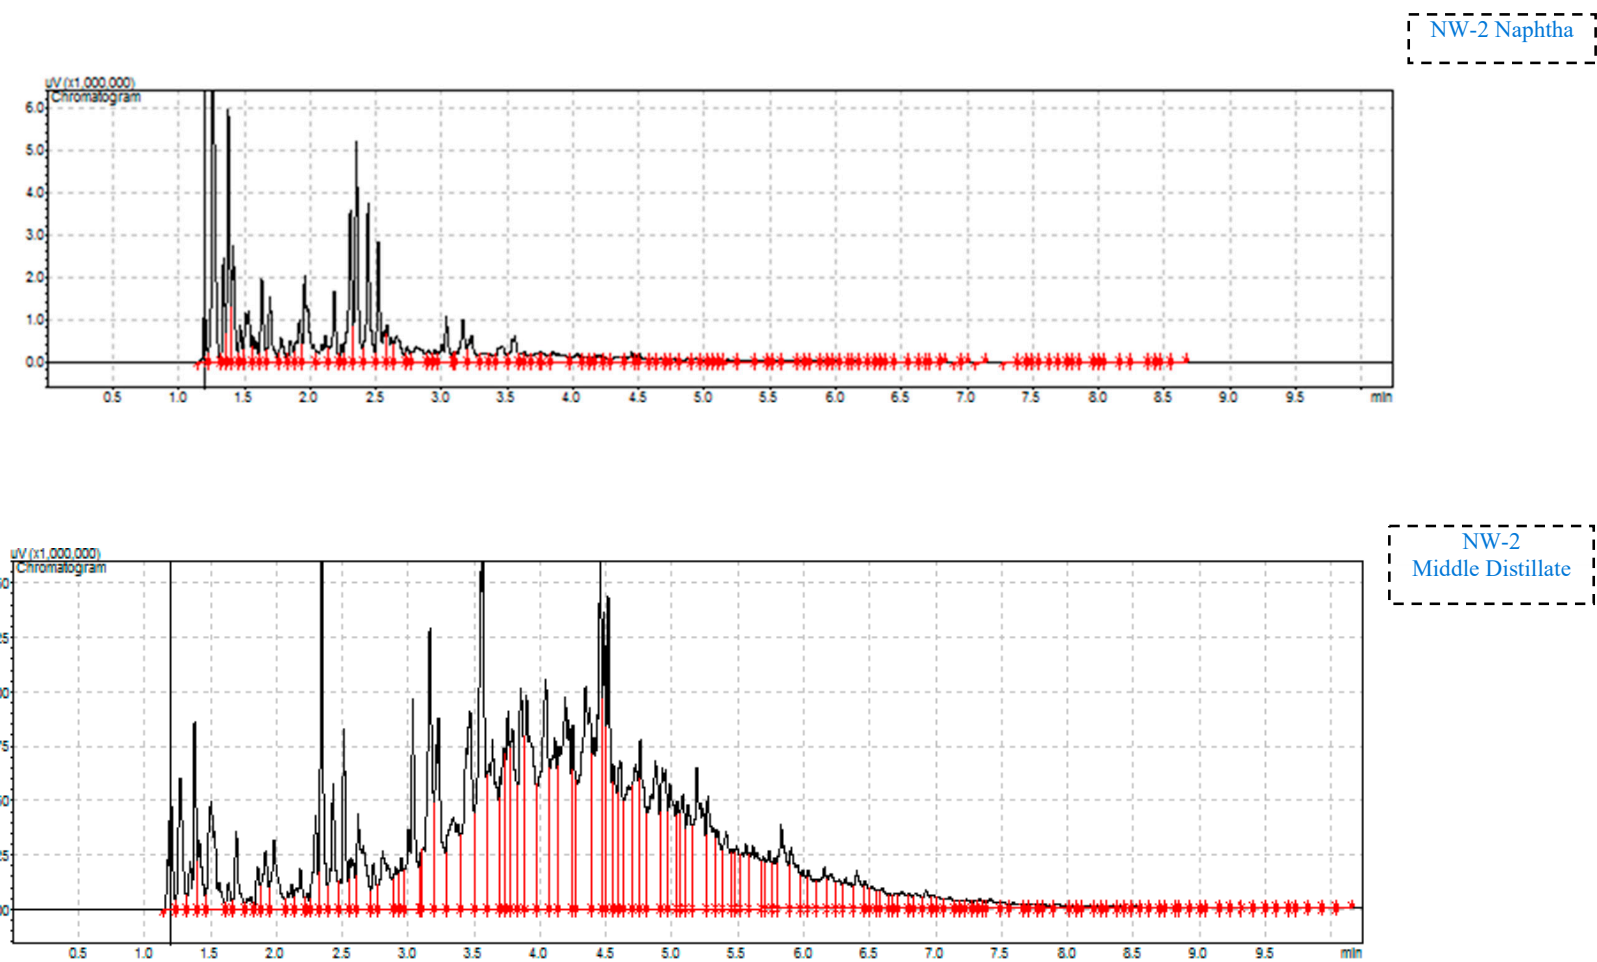

Supplementary-Figure S4. GC-FID results of NW-2 naphtha and NW-2 middle distillate

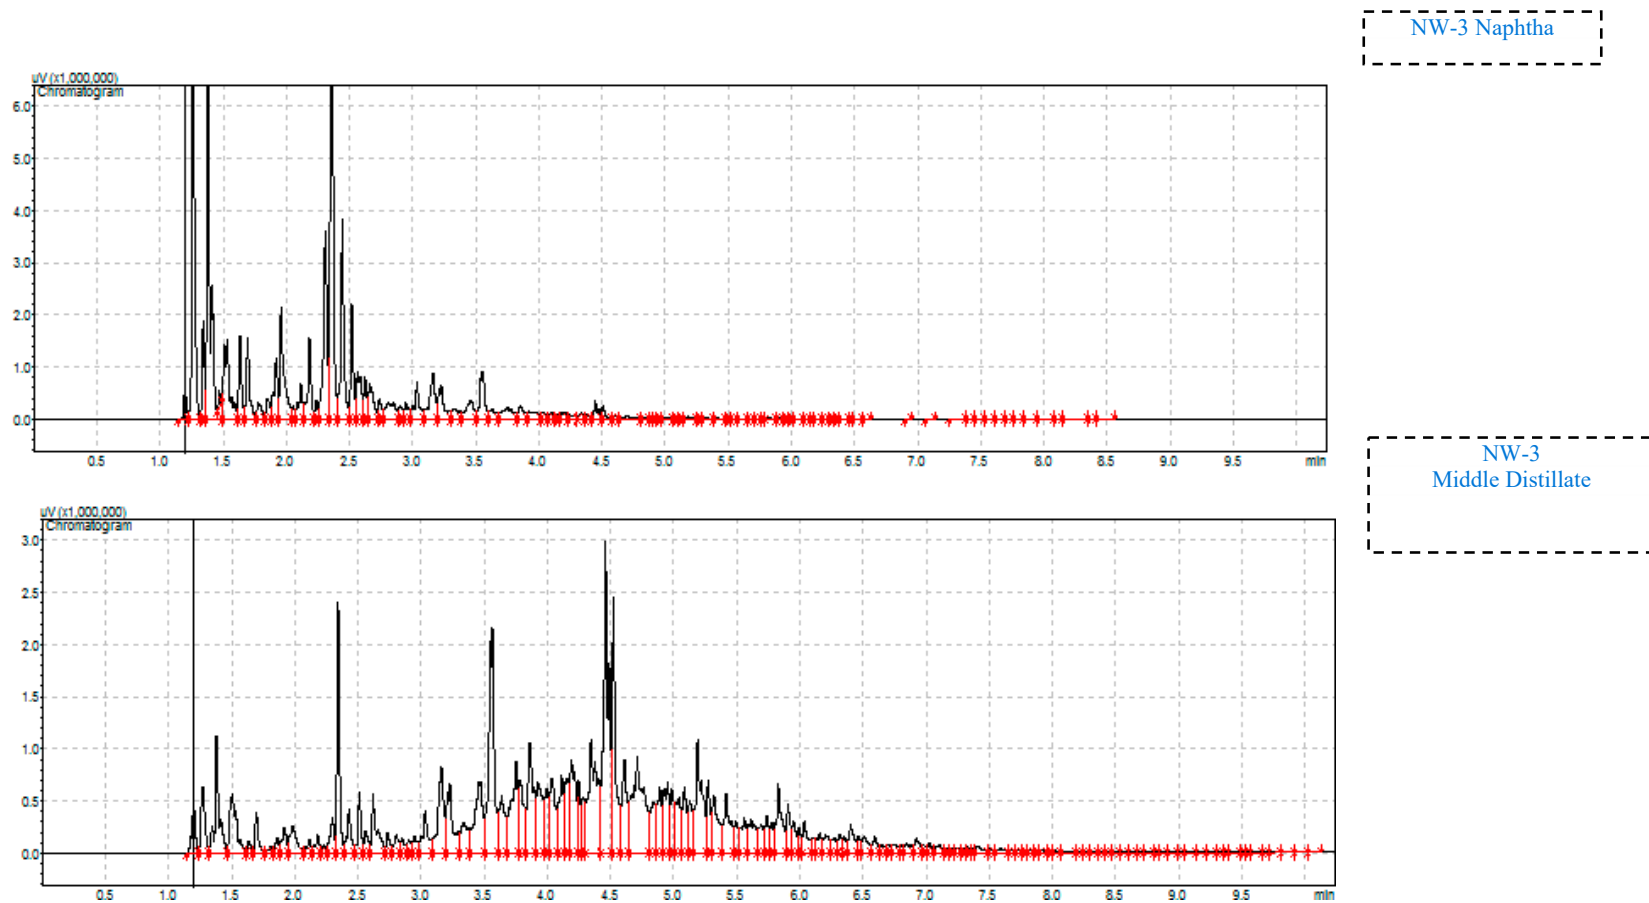

Supplementary-Figure S5. GC-FID results of NW-3 naphtha and NW-3 middle distillate

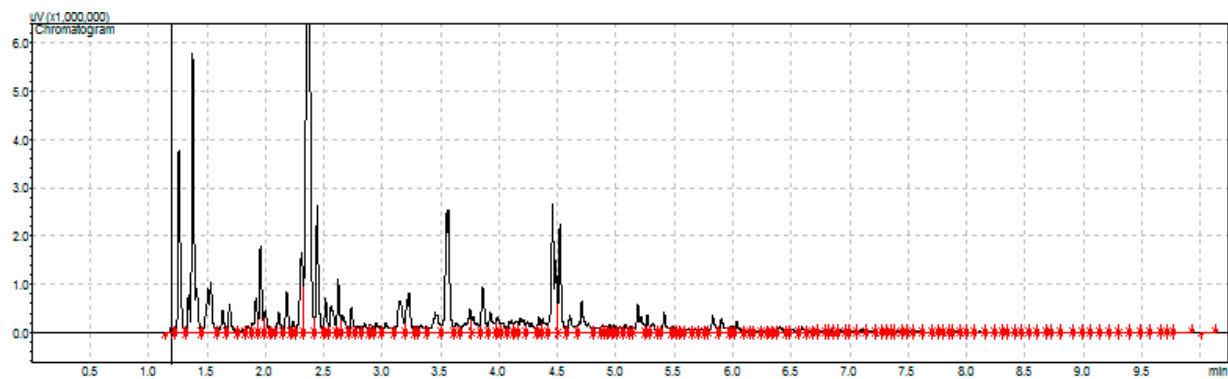

NW-4 Naphtha

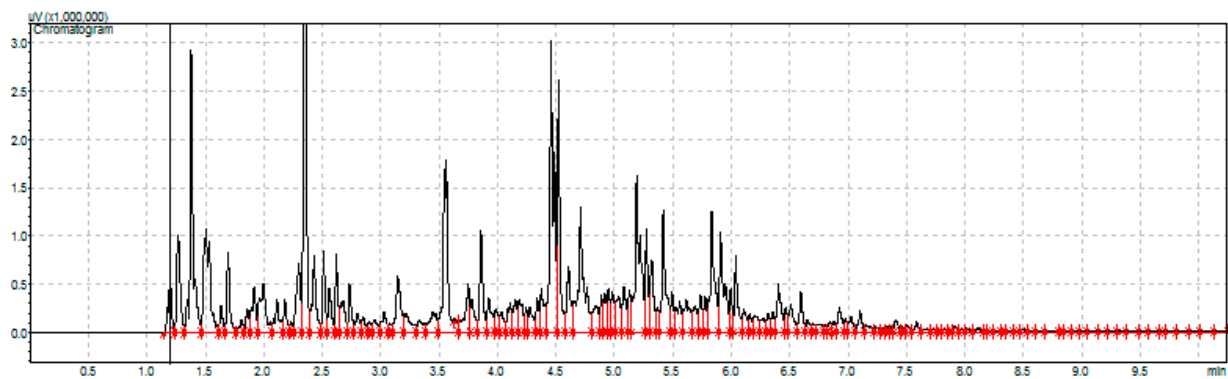

NW-4  
Middle Distillate

**Supplementary-Figure S6.** GC-FID results of NW-4 naphtha and NW-4 middle distillate

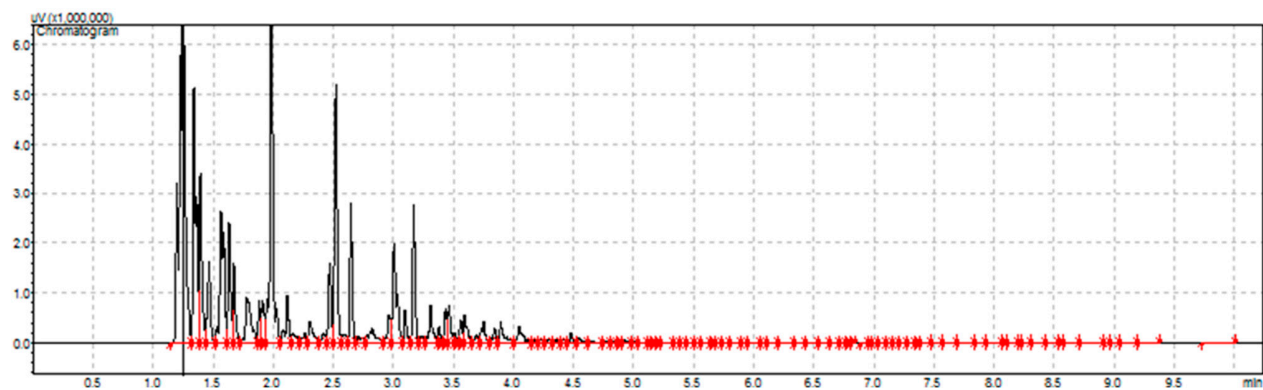

Commercial  
Gasoline Sample

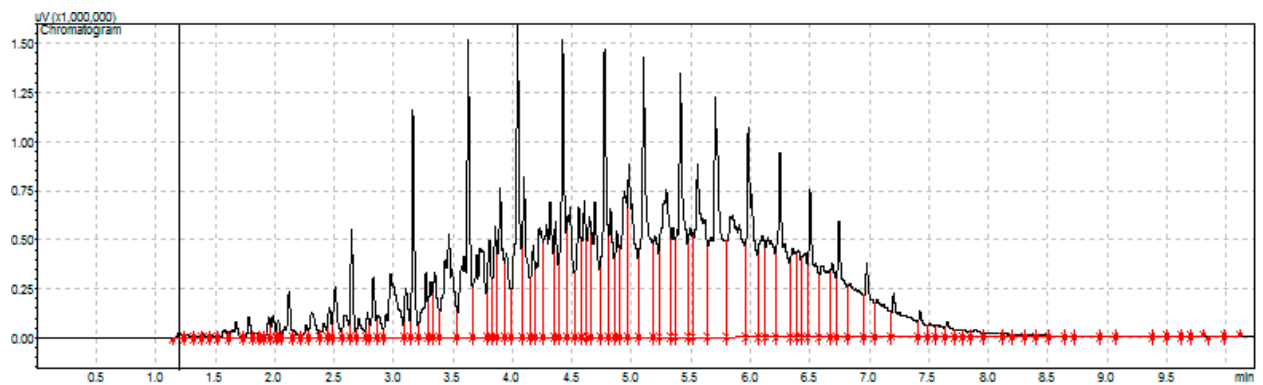

Commercial  
Diesel Sample

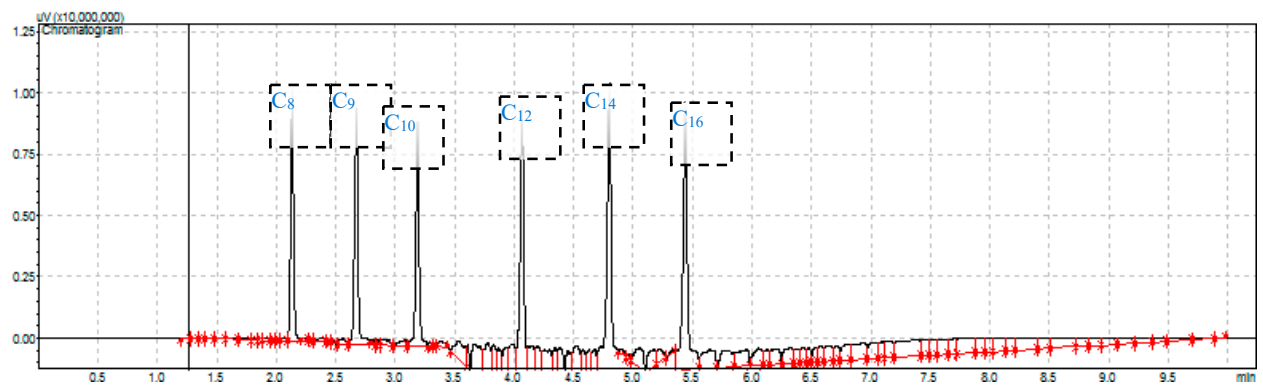

Oil Mix Sample  
For  
Reference  
Points

**Supplementary-Figure S7.** GC-FID results of Commercial Gasoline Sample, Commercial Diesel Sample, and Oil Mix Sample for Reference Points

#### References for Supplementary Materials

1. Jin, K.; Vozka, P.; Gentilcore, C.; Kilaz, G.; Wang, N.H.L. Low-pressure hydrothermal processing of mixed polyolefin wastes into clean fuels. *Fuel*. **2021**, *294*, 120505.
2. Lee, S.B.; Lee, J.; Tsang, Y.F.; Kim, Y.M.; Jae, J.; Jung, S.C.; Park, Y.K. Production of value-added aromatics from wasted COVID-19 mask via catalytic pyrolysis. *Environ. Pollut.* **2021**, *283*, 117060.
3. Fu, Z.; Zhang, Y.S.; Ji, G.; Li, A. Hydrothermal transformation behavior and degradation pathway analysis of waste surgical masks in supercritical water. *Process Saf. Environ. Prot.* **2023**, *176*, 776-785.
4. Vlasopoulos, A.; Malinauskaite, J.; Żabnieńska-Góra, A.; Jouhara, H. Life cycle assessment of plastic waste and energy recovery. *Energy* **2023**, *277*, 127576.
